# Supplementary material
Source: Springer Nature journal article supplement (https://www.springermedizin.de/resource/supplementary/12971_2014_221_MOESM3_ESM.pdf/9595106)

# TCF21

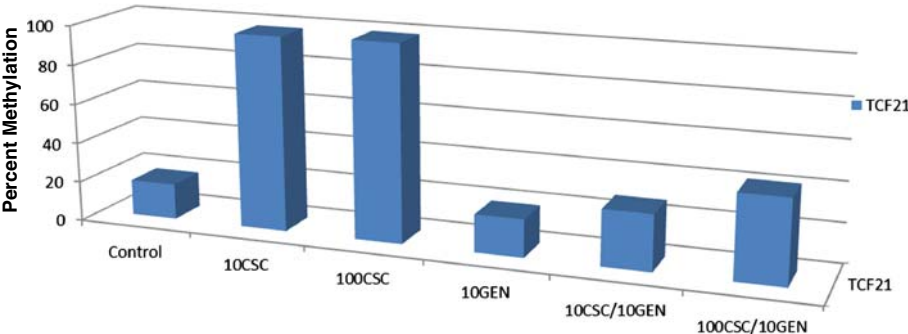

Supplement: MOESM3 [file 9595106]
